# Supplementary material for: Photophysics of lumichrome in anionic and cationic micellar media
Source: Royal Society of Chemistry journal article supplement (doi:10.1039/c4ra14998j), 2014-12-05
Supplement: c4ra14998j1.pdf [file c4ra14998j1.pdf]

# Supporting Information

## Photophysics of Lumichrome in Anionic and Cationic Micellar Media

### Media

Banibrata Maity, Aninda Chatterjee and Debabrata Seth\*

Department of Chemistry,  
Indian Institute of Technology Patna  
Patna 800013, Bihar, India

E-mail : debabrata@iitp.ac.in; Fax : 91-612-2277383

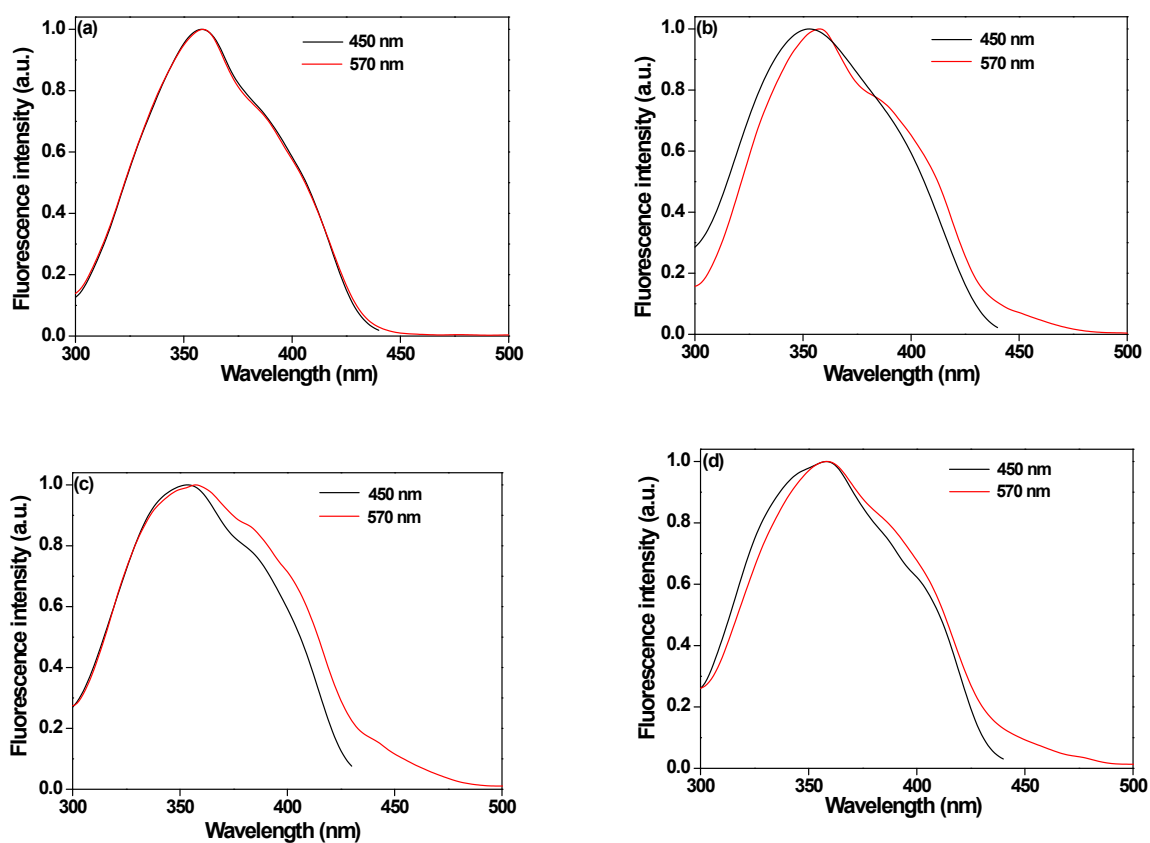

**Fig. S1.** The fluorescence excitation spectra of LCM in (a) pure water, (b) SDS, (c) DTAB and (d) MTAB micelles. The observation wavelengths were at 450 nm (black) and 570 nm (red).

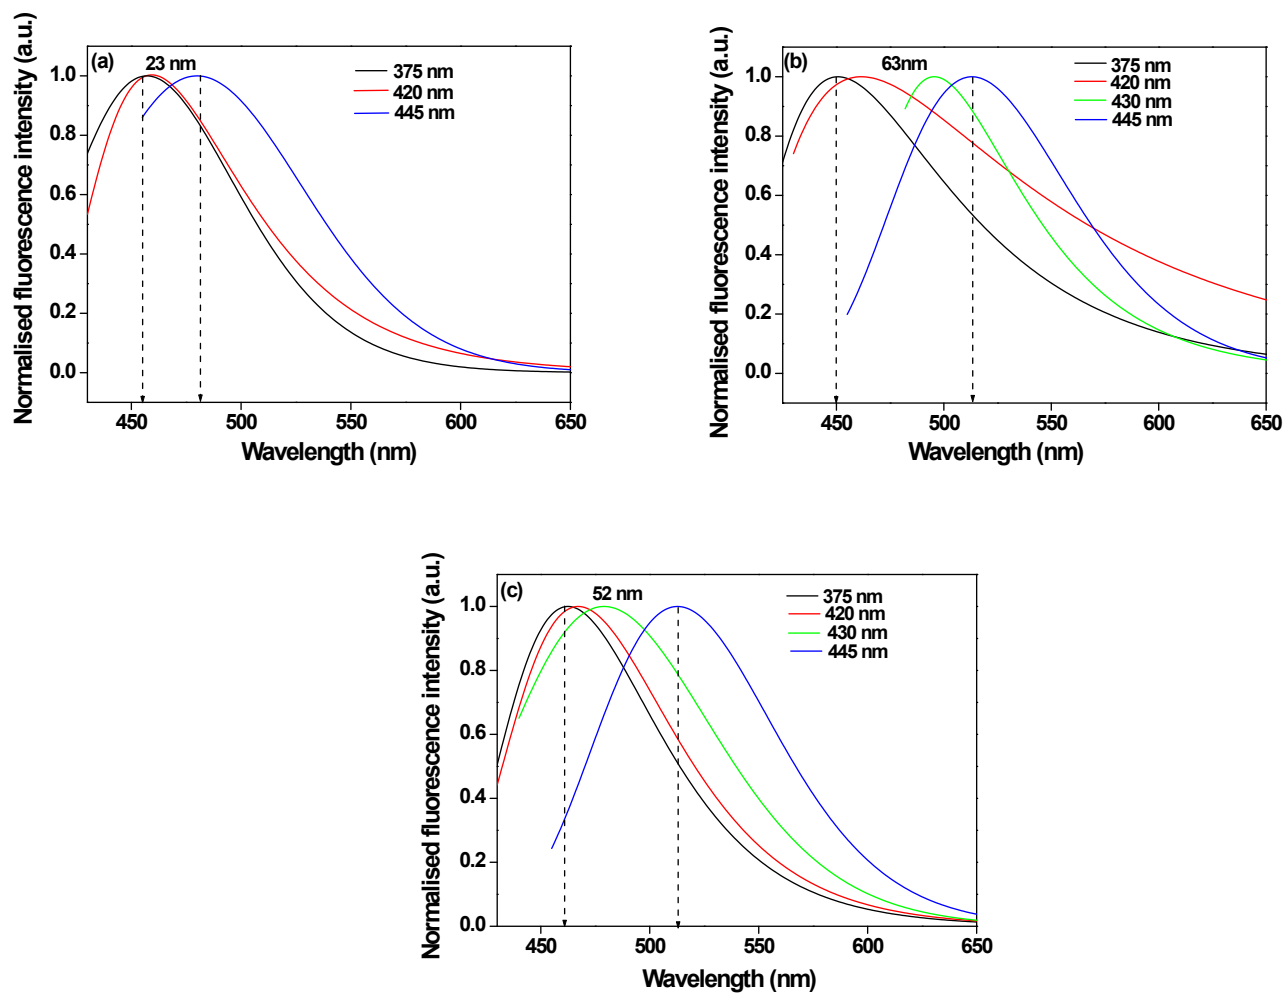

**Fig. S2.** The excitation wavelength dependent emission shift of LCM in the presence of (a) SDS, (b) DTAB and (c) MTAB micelles ( $\lambda_{\text{exi}} = 375$  to 445 nm).

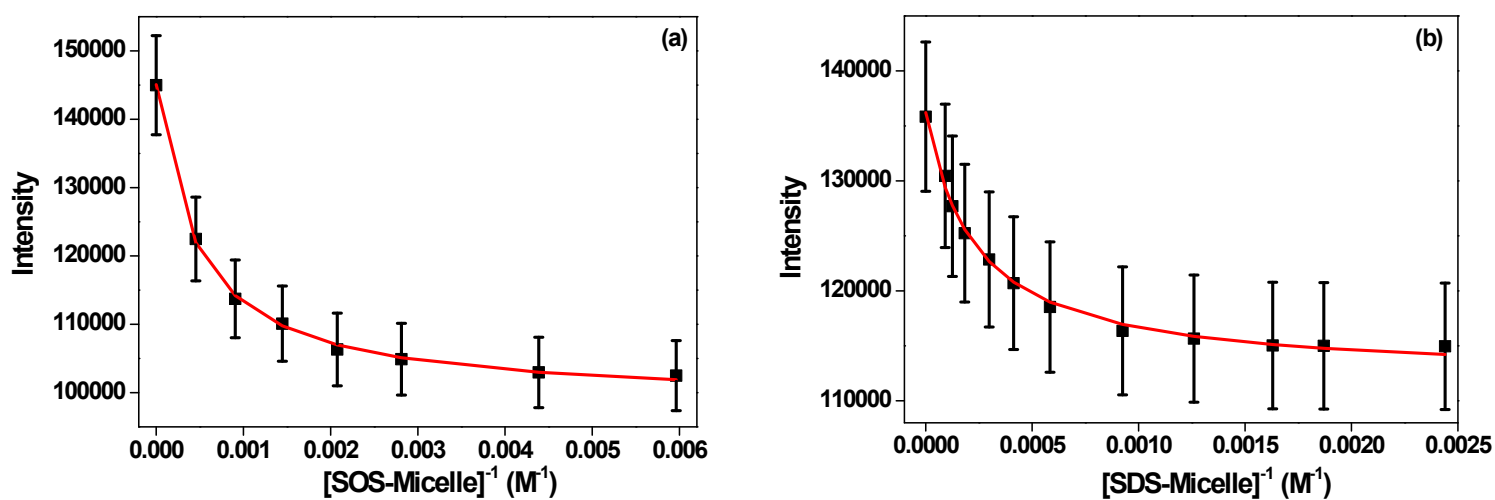

**Fig. S3.** The plot of fluorescence intensity against [Micelle] in (a) SOS and (b) SDS micelles.

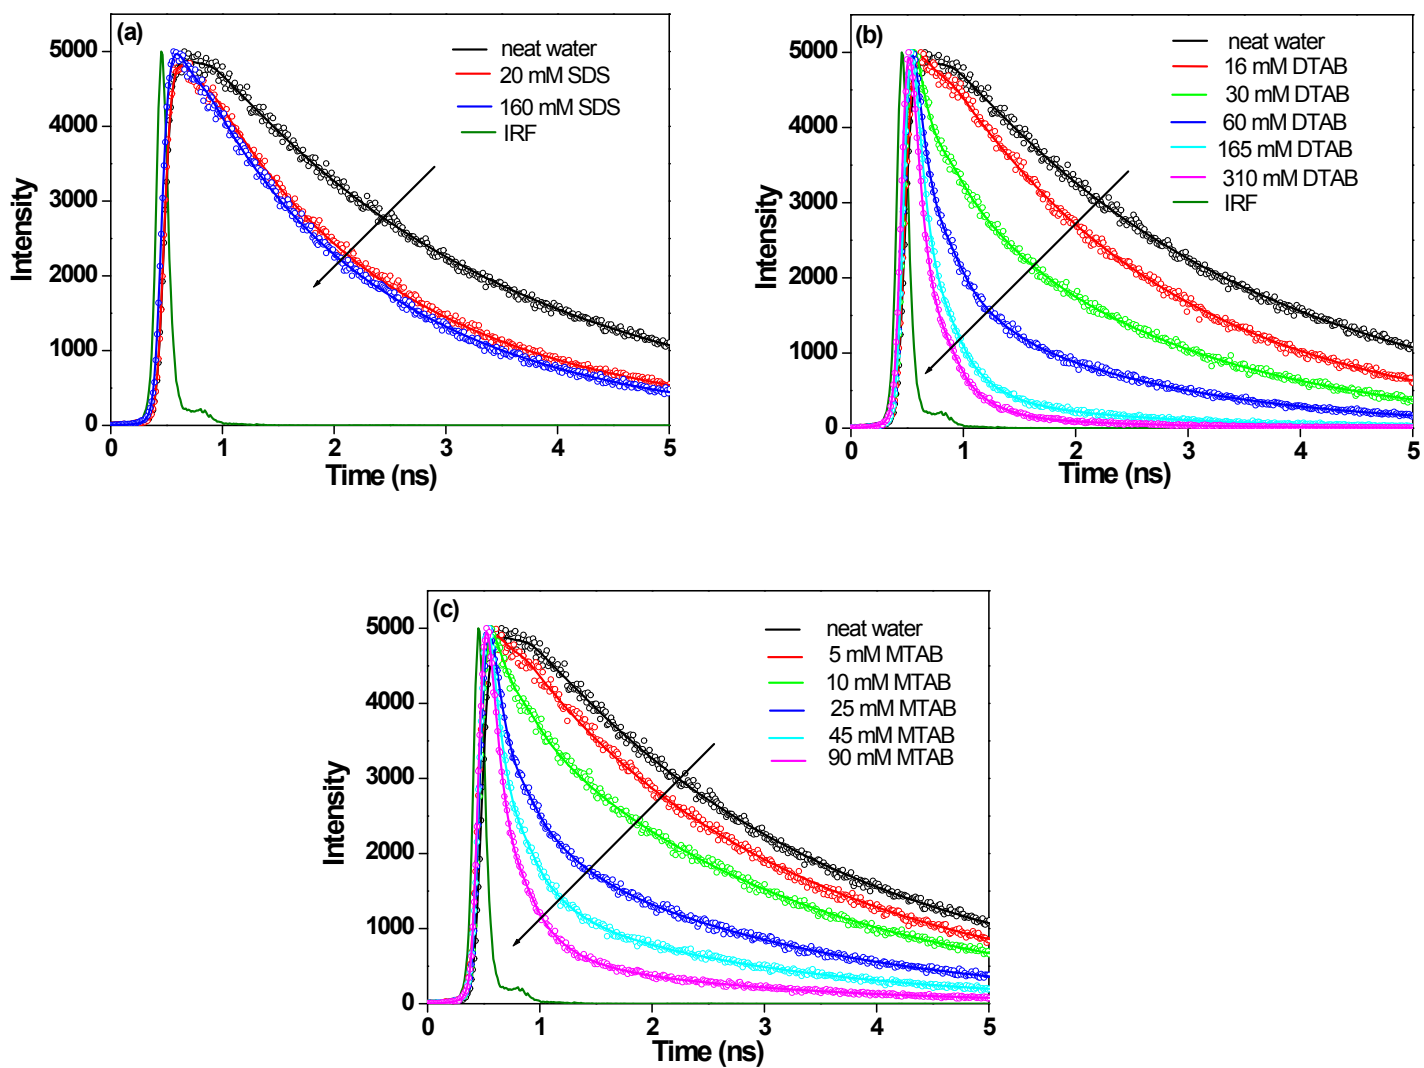

**Fig. S4.** The time resolved fluorescence emission decays of LCM with gradual addition of (a) SDS, (b) DTAB and (c) MTAB micelles, beyond their respective CMC values ( $\lambda_{\text{exi}} = 375$  nm).

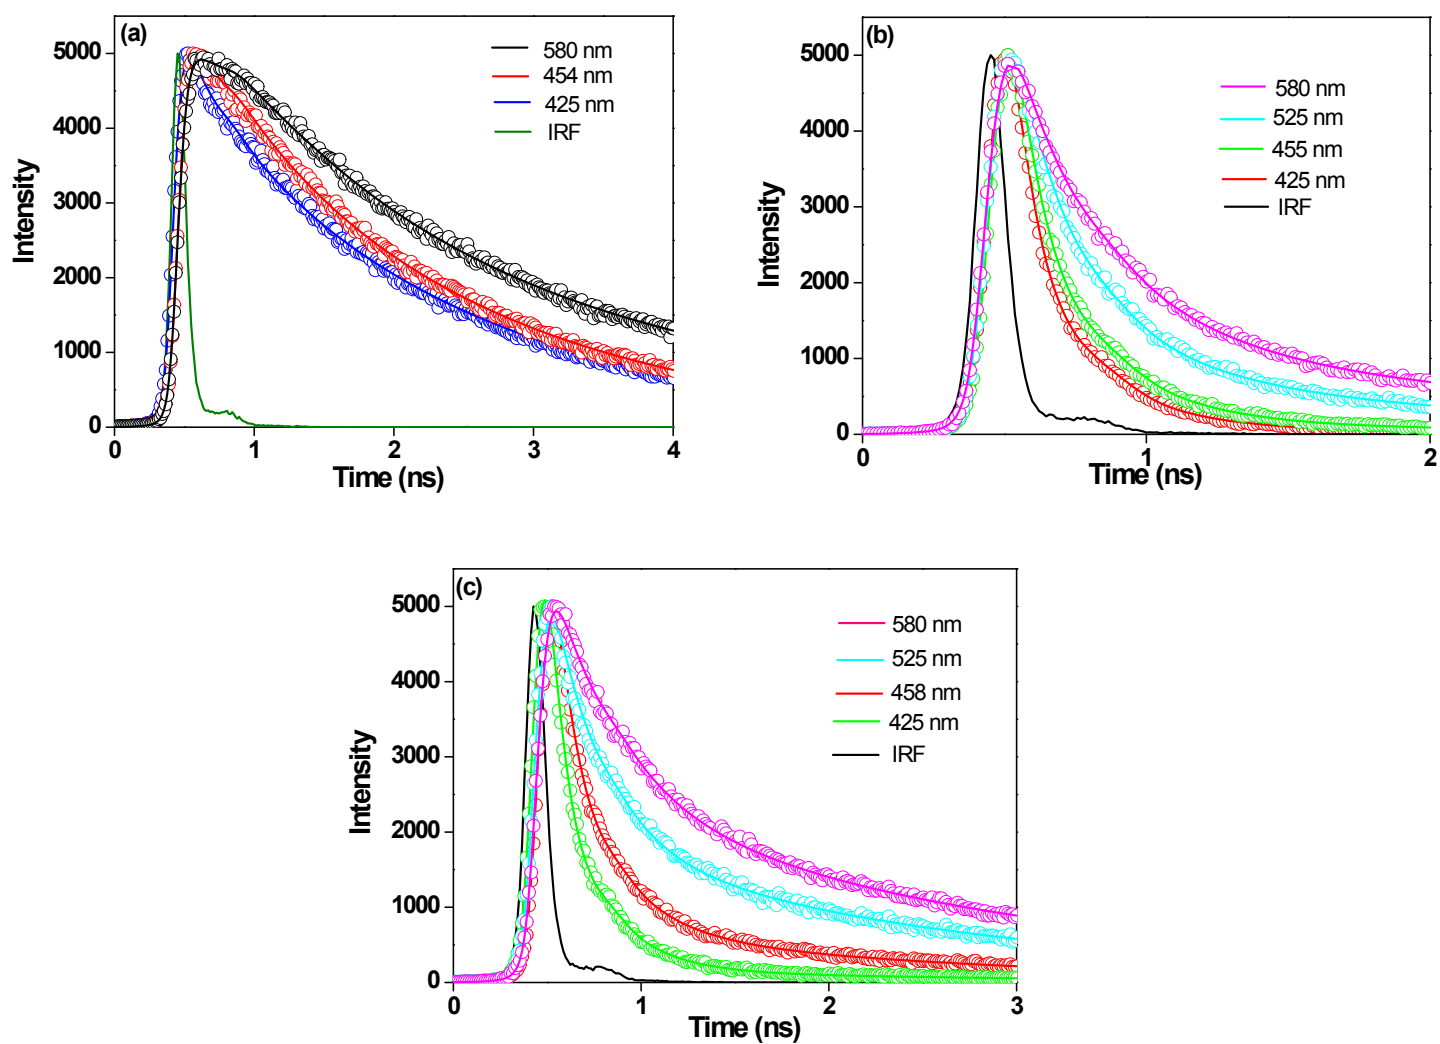

**Fig. S5.** The emission wavelength dependent fluorescence emission decays of LCM in (a) SDS, (b) DTAB and (c) MTAB micelles.

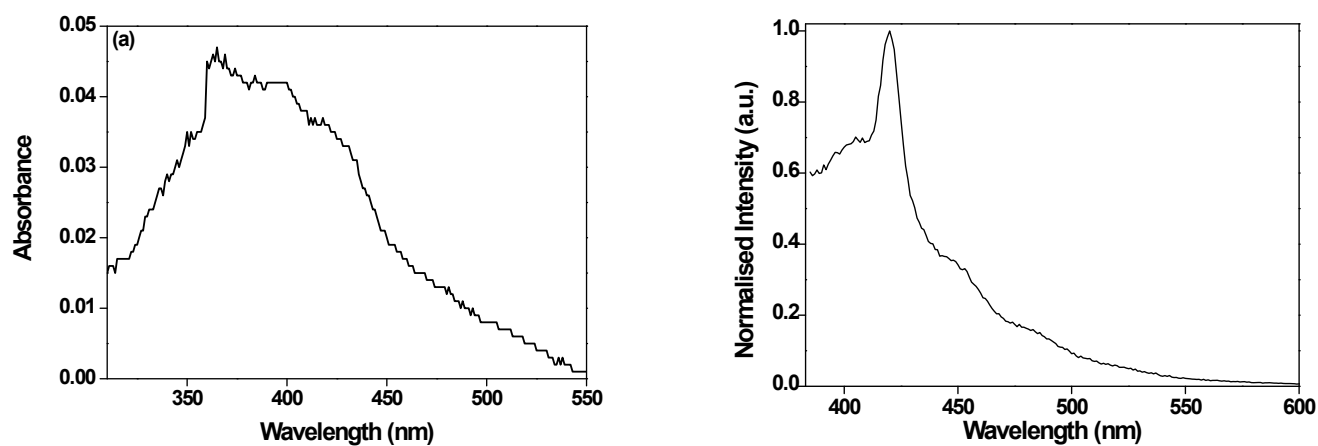

**Fig. S6.** (a) The absorption and (b) emission spectra of LCM in isooctane.

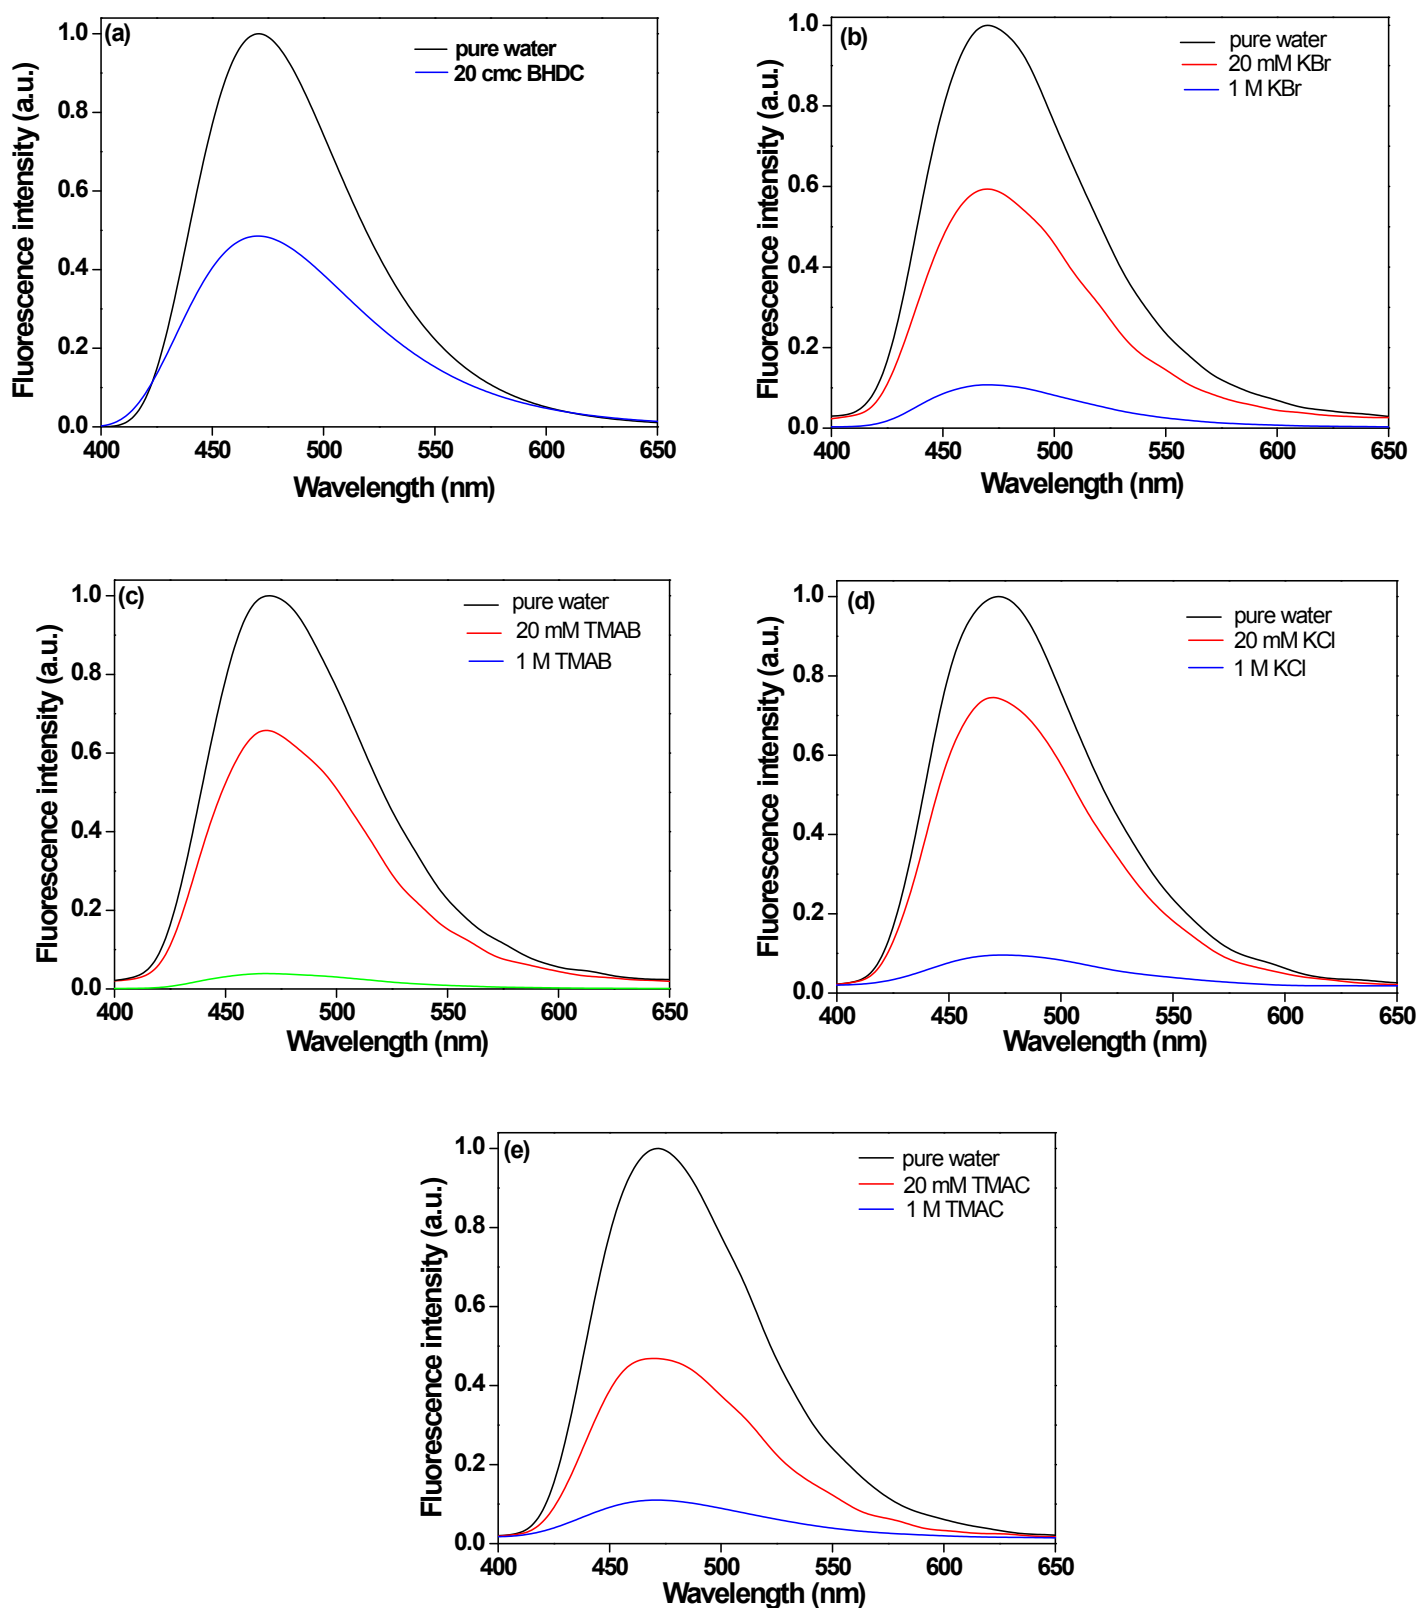

**Fig. S7.** The emission spectral profile of LCM ( $\lambda_{\text{exi}} = 375$  nm) in (a) BHDC micelles and in presence of (b) KBr, (c) TMAB, (d) KCl and (e) TMAC salts.

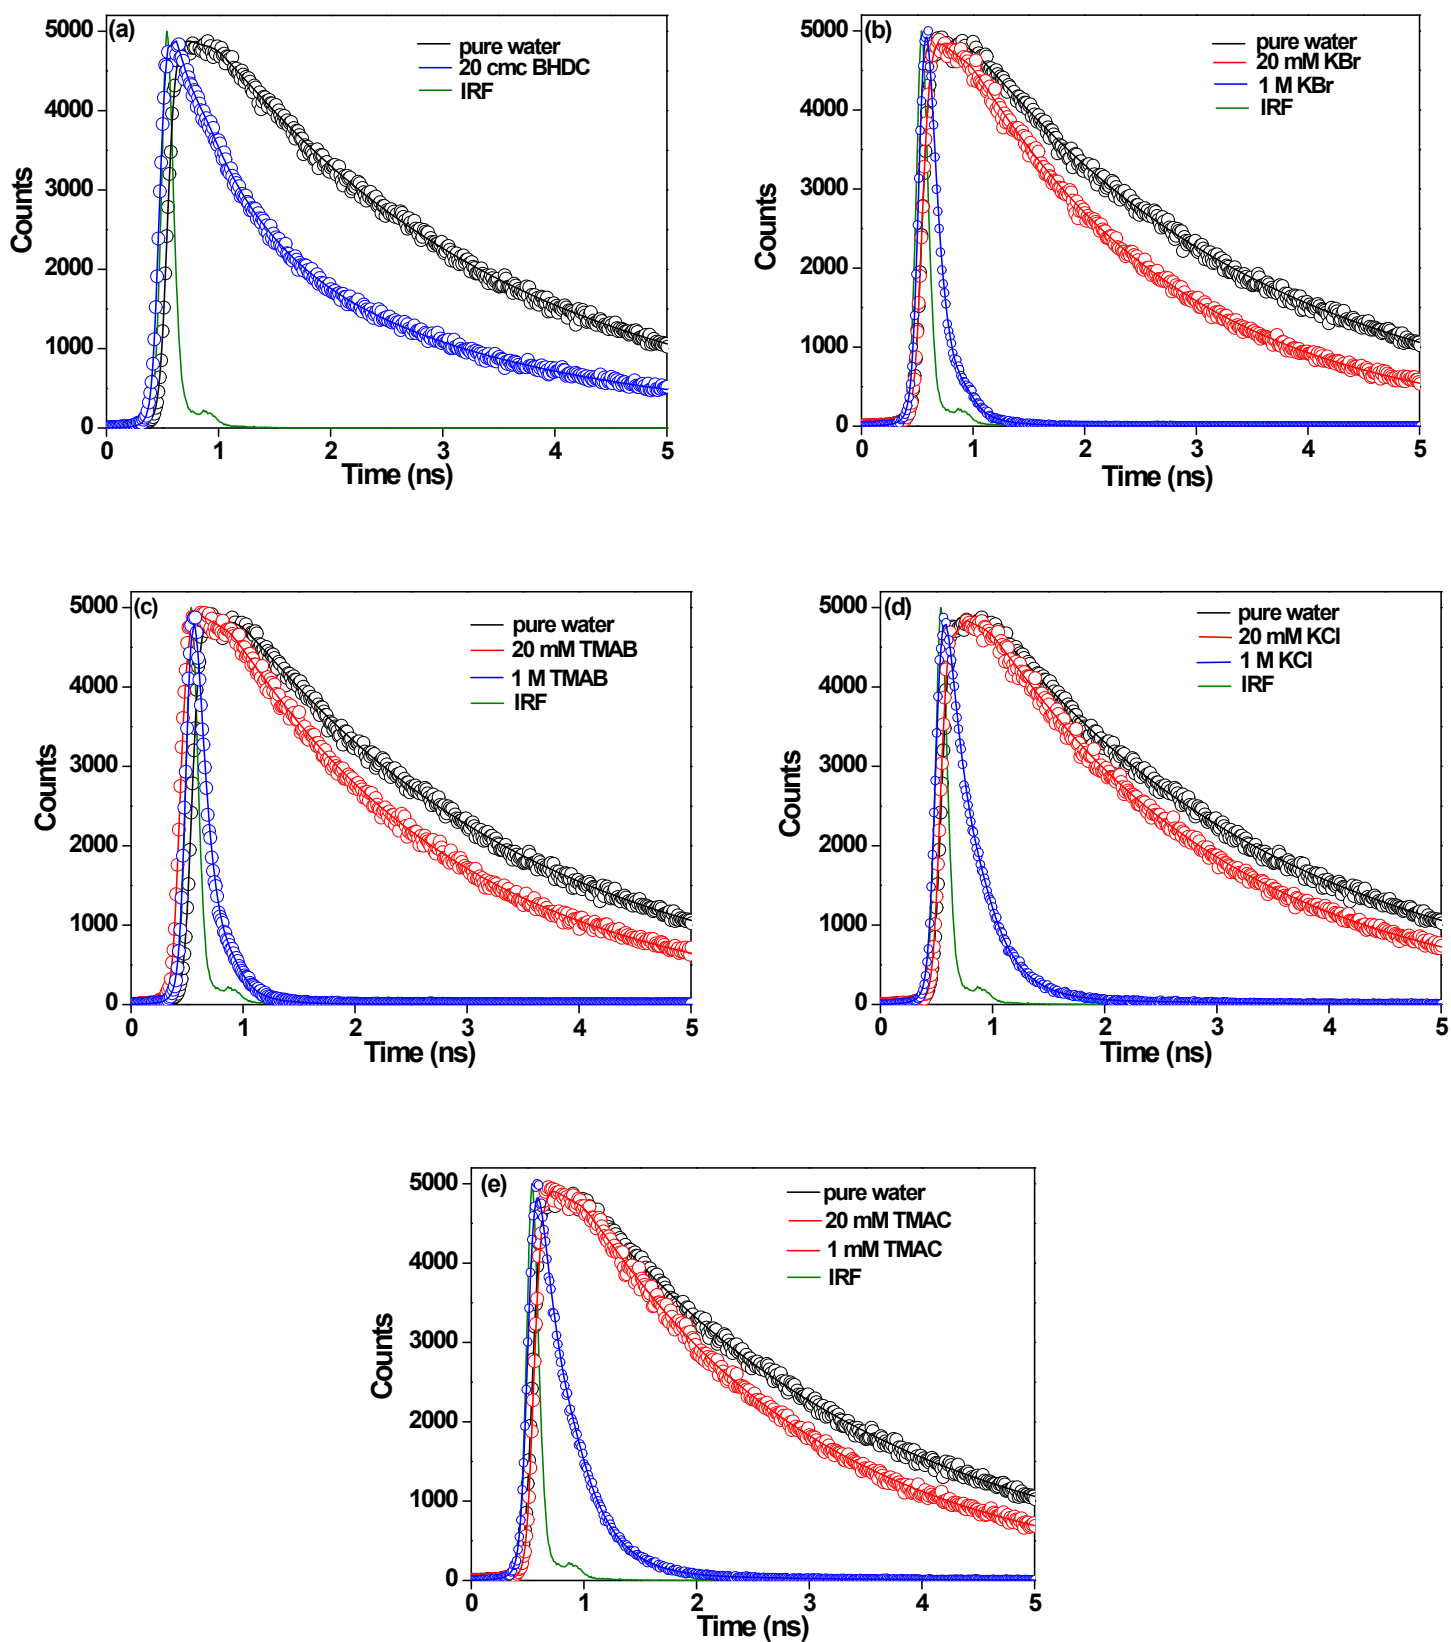

**Fig. S8.** The time resolved fluorescence emission decays of LCM in (a) BHDC micelles and in presence of (b) KBr, (c) TMAB, (d) KCl and (e) TMAC salts.

**Table S1** The fluorescence lifetime components of LCM in presence of BHDC micelles and in different salts ( $\lambda_{\text{exi}} = 375 \text{ nm}$ ,  $\lambda_{\text{emi}} = 470 \text{ nm}$ ).

| Medium                                       | $\tau_1$ (ns) | $a_1$ | $\tau_2$ (ns) | $a_2$ | $\tau_3$ (ns) | $a_3$ | $\langle \tau_f \rangle$ (ns) | $\chi^2$ |
|----------------------------------------------|---------------|-------|---------------|-------|---------------|-------|-------------------------------|----------|
| LCM in pure water                            |               |       |               |       | 2.700         | 1.000 | 2.700                         | 1.084    |
| LCM in BHDC micelles <sup>a,b</sup> (20 CMC) | 0.200         | 0.340 | 0.670         | 0.350 | 2.630         | 0.310 | 1.110                         | 1.030    |
| LCM in 20 mM KBr                             |               |       |               |       | 1.900         | 1.000 | 1.900                         | 1.050    |
| LCM in 1M KBr                                | 0.090         | 0.990 |               |       | 0.470         | 0.010 | 0.090                         | 1.040    |
| LCM in 20 mM TMAB                            |               |       |               |       | 2.050         | 1.000 | 2.050                         | 1.100    |
| LCM in 1M TMAB                               | 0.110         | 0.990 |               |       | 0.710         | 0.001 | 0.116                         | 1.286    |
| LCM in 20 mM KCl                             |               |       |               |       | 2.13          | 1.00  | 2.130                         | 0.99     |
| LCM in 1M KCl                                | 0.220         | 0.985 |               |       | 1.47          | 0.015 | 0.240                         | 1.097    |
| LCM in 20 mM TMAC                            |               |       |               |       | 2.06          | 1.00  | 2.06                          | 1.00     |
| LCM in 1M TMAC                               | 0.260         | 0.984 |               |       | 1.47          | 0.016 | 0.280                         | 1.080    |

<sup>a</sup>CMC of BHDC = 0.49 mM<sup>b</sup>

<sup>b</sup>Z. Grenoble and S. Baldelli, *J. Phys. Chem. B* 2013, **117**, 259.
